# Supplementary material
Source: PubMed Central journal article supplement (PMC4775889)
Supplement: SD4.pdf [file SD4.pdf]

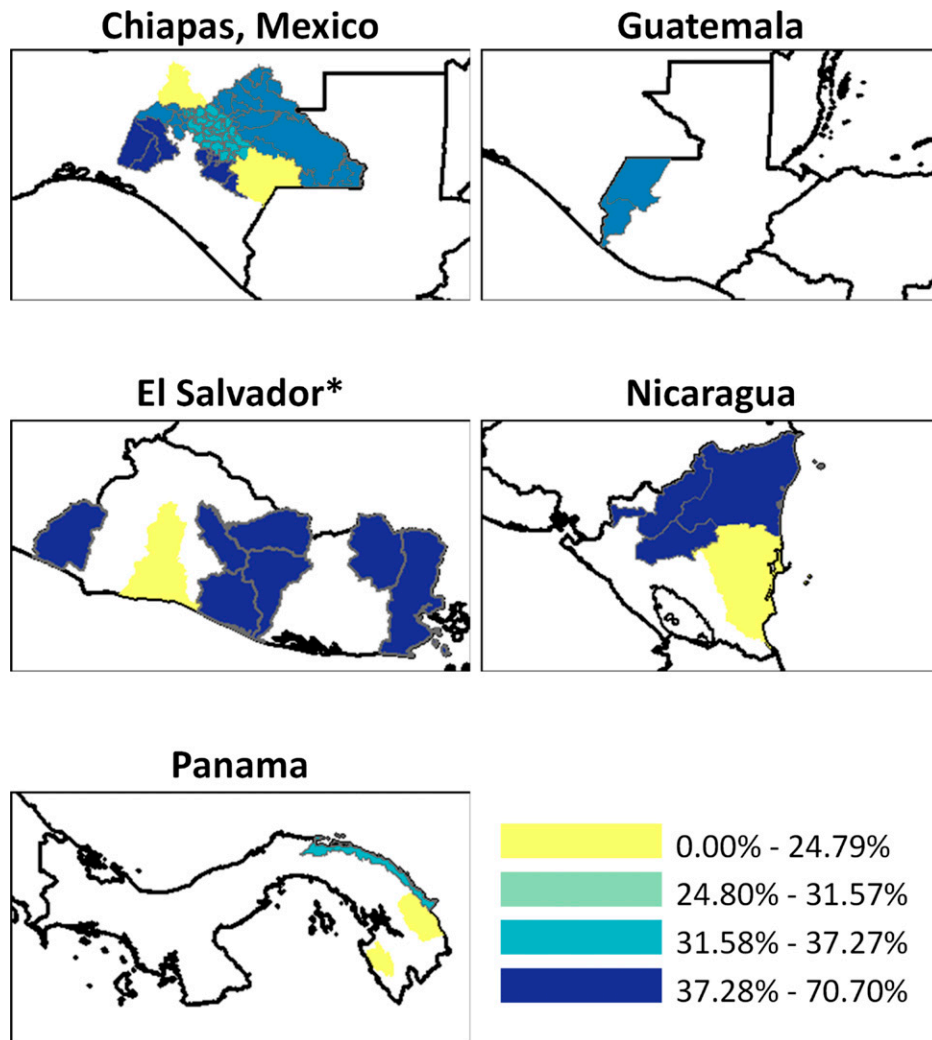

SUPPLEMENTAL FIGURE 1. Use of oral rehydration solution (ORS) among diarrheal children under 5 years of age in Mesoamerica, 2011–2013. Colors represent quartiles of ORS use across countries. Areas in white were not sampled. \* Statistically significant differences in the prevalence between assessed departments.

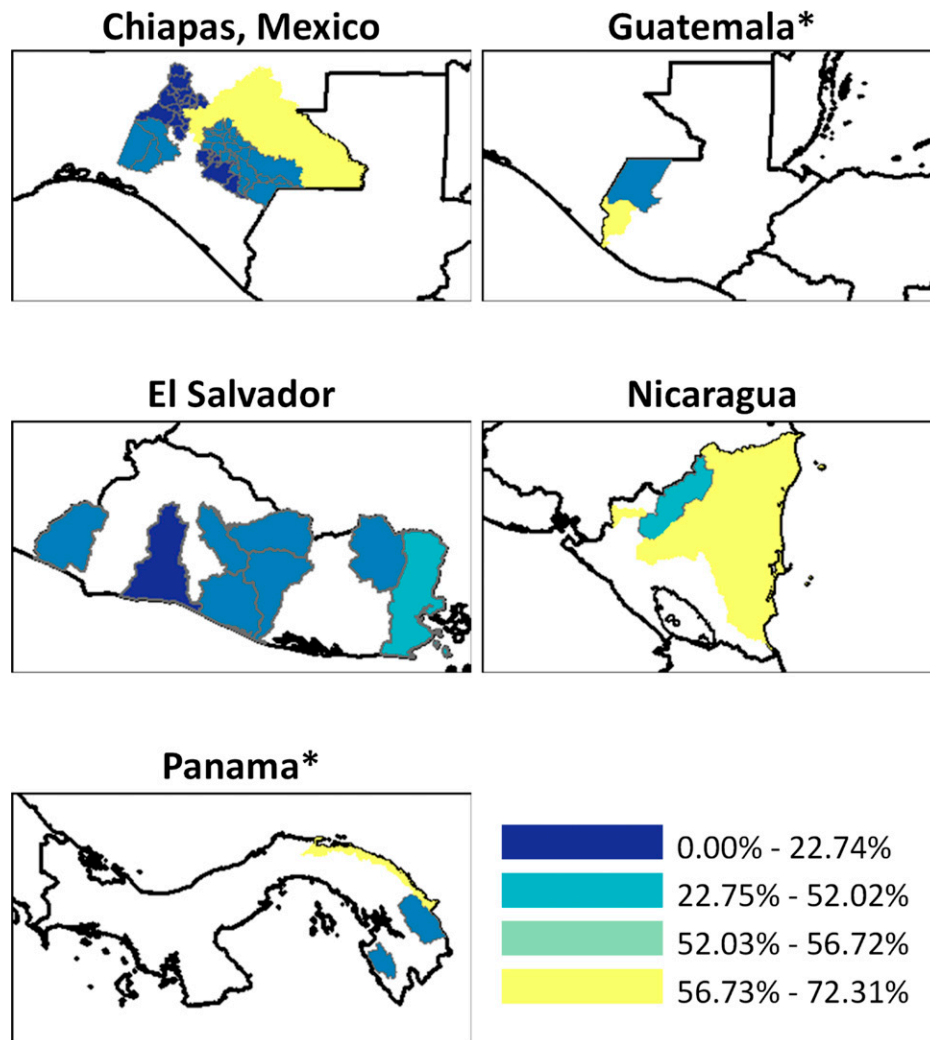

SUPPLEMENTAL FIGURE 2. Provision of less fluid to drink than usual for diarrheal children under 5 years of age in Mesoamerica, 2011–2013. Colors represent quartiles of being given less to drink than usual across countries. Areas in white were not sampled. \* Statistically significant differences in the prevalence between assessed departments.

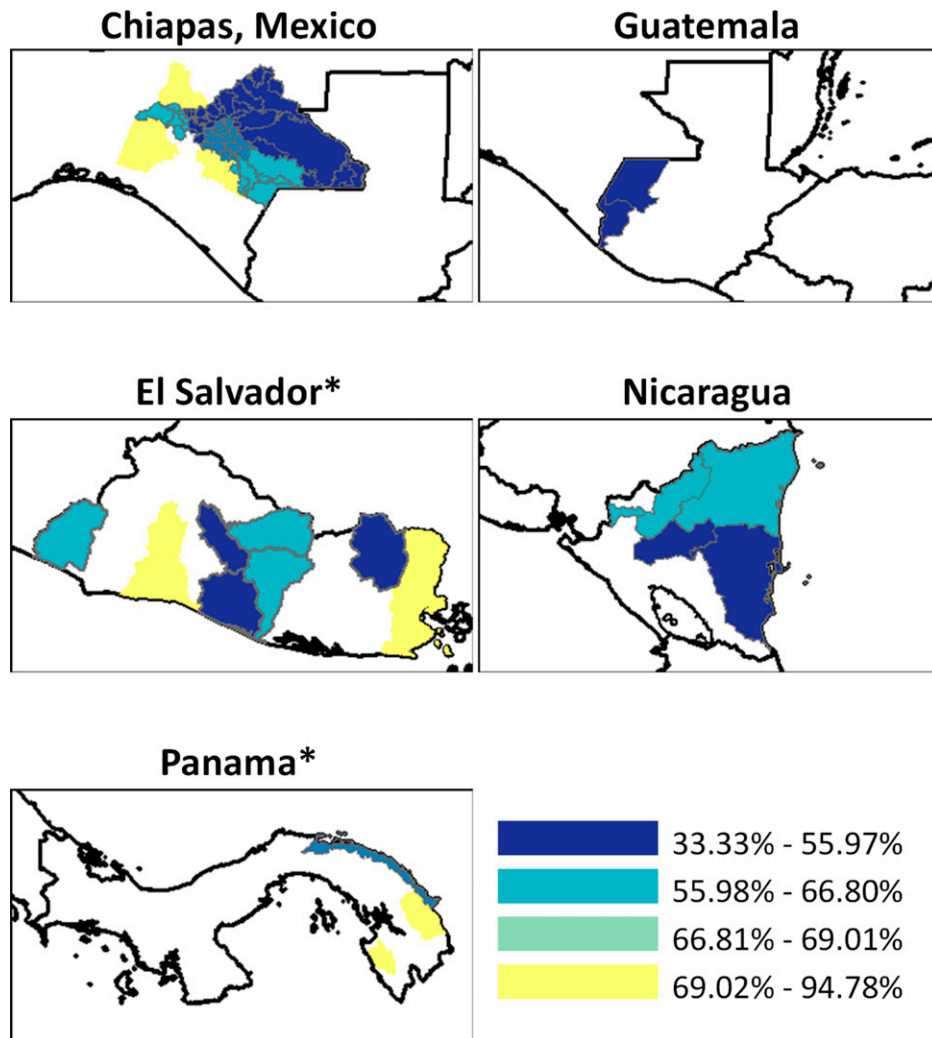

SUPPLEMENTAL FIGURE 3. Provision of less food to eat than usual for diarrheal children under 5 years of age in Mesoamerica, 2011–2013. Colors represent quartiles of being given less to eat than usual across countries. Areas in white were not sampled. \* Statistically significant differences in the prevalence between assessed departments.

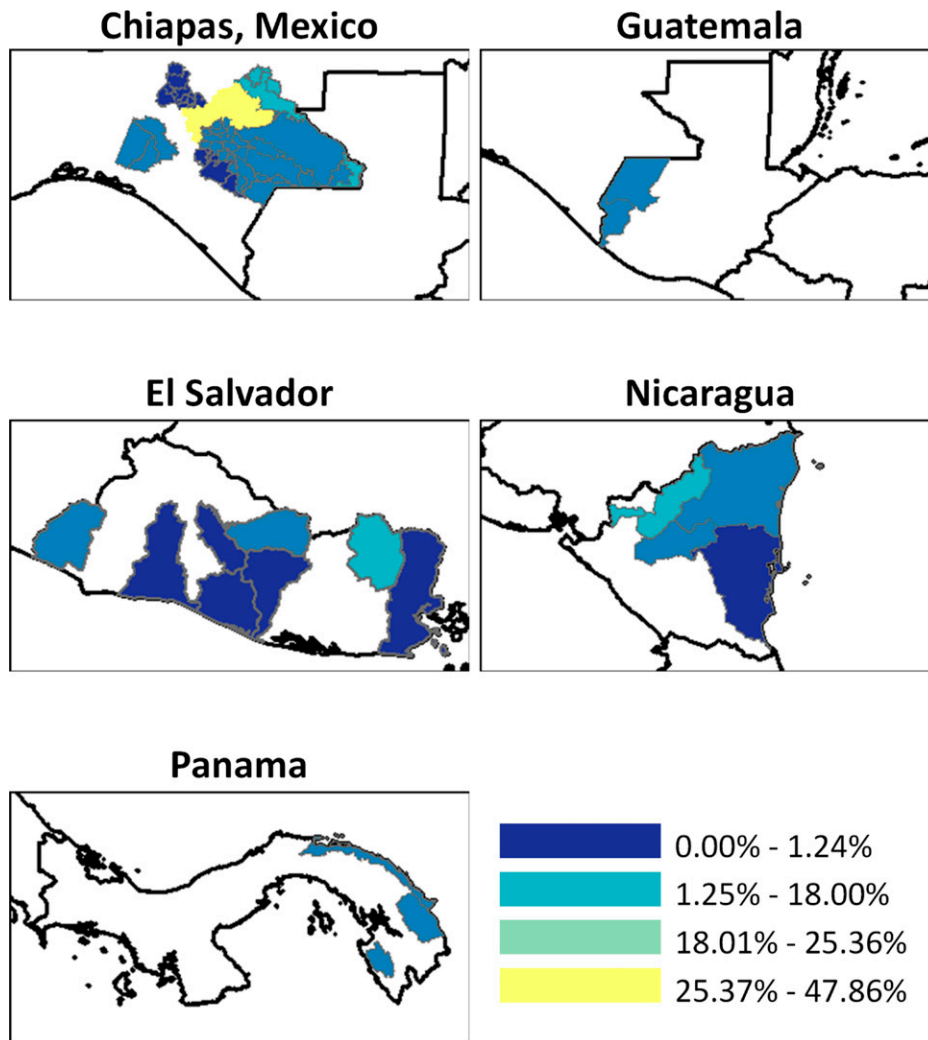

SUPPLEMENTAL FIGURE 4. Use of antimotility medication among diarrheal children under 5 years of age in the Salud Mesoamérica 2015 Initiative, 2011–2013. Colors represent quartiles of antimotility medication use across countries. Areas in white were not sampled.

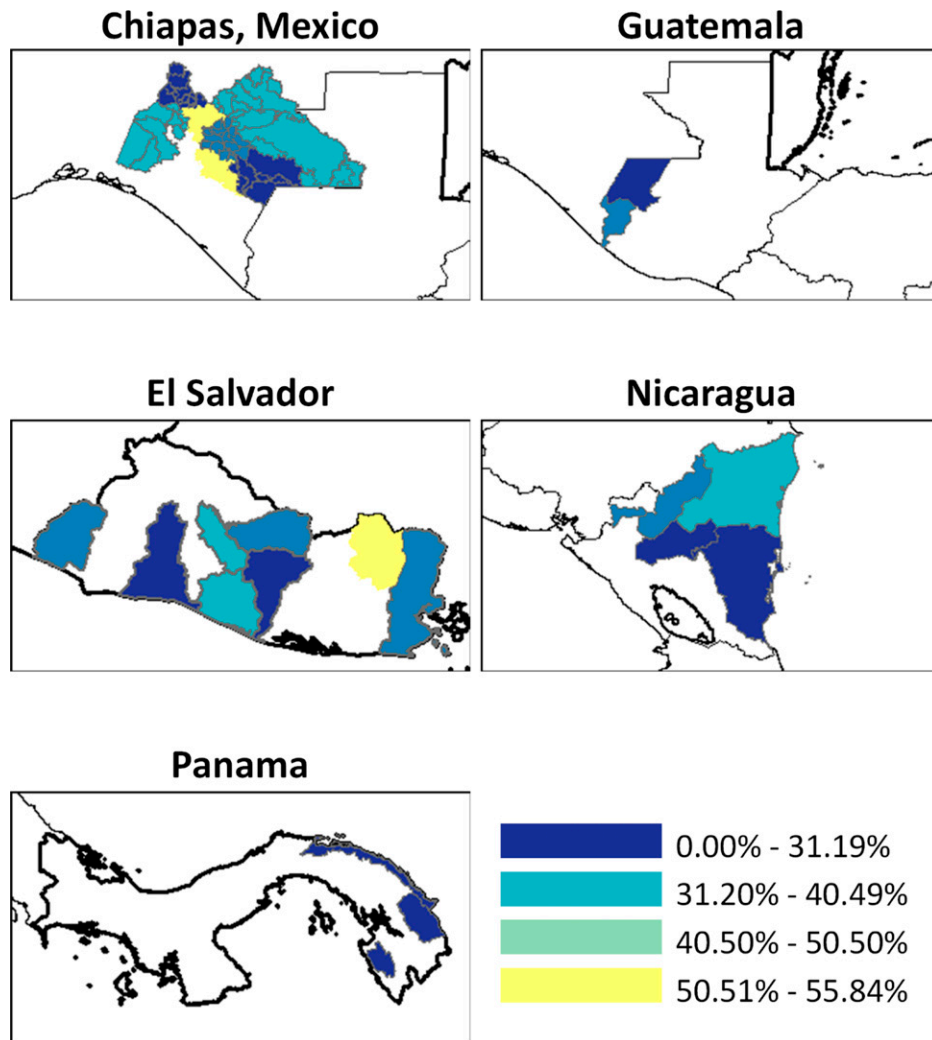

SUPPLEMENTAL FIGURE 5. Use of antibiotics among diarrheal children under 5 years of age in Mesoamerica, 2011–2013. Colors represent quartiles of antibiotic use across countries. Areas in white were not sampled.

SUPPLEMENTAL TABLE 1  
Predictors for diarrhea among Guatemalan children under 5 years of age, 2013

|                                     | Univariable (N = 4,100) |             | Multivariable (N = 3,989) |             |
|-------------------------------------|-------------------------|-------------|---------------------------|-------------|
|                                     | RR                      | 95% CI      | aRR                       | 95% CI      |
| Child's age (months)                |                         |             |                           |             |
| 0-5                                 | 1.00                    | Ref         | 1.00                      | Ref         |
| 6-23                                | 1.87                    | 1.44-2.45** | 1.93                      | 1.47-2.53** |
| 24-35                               | 1.64                    | 1.21-2.23** | 1.75                      | 1.28-2.39** |
| 36-59                               | 1.06                    | 0.77-1.45   | 1.15                      | 0.82-1.60   |
| Male child                          | 1.12                    | 0.95-1.33   |                           |             |
| Firstborn child                     | 1.30                    | 1.07-1.58** |                           |             |
| Indigenous ethnicity                | 0.84                    | 0.67-1.06   |                           |             |
| Mother's age (years)                | 0.98                    | 0.97-1.00*  |                           |             |
| Highest level of education attained |                         |             |                           |             |
| None                                | 1.00                    | Ref         | 1.00                      | Ref         |
| Primary                             | 1.28                    | 1.09-1.52** | 1.05                      | 0.86-1.28   |
| Secondary                           | 1.96                    | 1.44-2.66** | 1.43                      | 1.03-1.99*  |
| High school or higher               | 1.91                    | 1.34-2.72** | 1.32                      | 0.88-1.97   |
| Mother is literate                  | 1.67                    | 1.39-2.01** | 1.47                      | 1.18-1.83** |
| Mother is a housewife               | 0.81                    | 0.56-1.18   |                           |             |
| Urban resident                      | 1.12                    | 0.83-1.51   |                           |             |
| Household asset index               |                         |             |                           |             |
| Low                                 | 1.00                    | Ref         |                           |             |
| Medium                              | 1.01                    | 0.82-1.24   |                           |             |
| High                                | 1.05                    | 0.81-1.36   |                           |             |
| Source of water                     |                         |             |                           |             |
| Tap                                 | 1.00                    | Ref         | 1.00                      | Ref         |
| Borewell                            | 0.71                    | 0.34-1.52   | 0.89                      | 0.43-1.82   |
| Other well or spring                | 1.32                    | 1.04-1.69*  | 1.39                      | 1.11-1.75** |
| Other                               | 1.05                    | 0.70-1.57   | 1.10                      | 0.74-1.64   |
| Water treatment                     |                         |             |                           |             |
| Drinking water is treated           | 1.45                    | 1.03-2.04*  |                           |             |
| Boil water†                         | 1.29                    | 0.97-1.72   |                           |             |
| Chlorinate water†                   | 1.31                    | 0.89-1.91   |                           |             |
| Filter water†                       | 0.96                    | 0.33-2.78   |                           |             |
| Other water treatment†              | 1.02                    | 0.50-2.09   |                           |             |
| Toilet type                         |                         |             |                           |             |
| Flush/pour flush toilet             | 0.86                    | 0.66-1.11   |                           |             |
| Latrine/toilet with hole            | 1.00                    | Ref         |                           |             |
| Dry toilet                          | 0.42                    | 0.23-0.76** |                           |             |
| No toilet                           | 0.79                    | 0.54-1.15   |                           |             |
| Other                               | 0.92                    | 0.19-4.34   |                           |             |
| Toilet is shared with other homes‡  | 1.30                    | 0.88-1.90   |                           |             |

aRR = adjusted relative risk; CI = confidence interval; Ref = reference; RR = relative risk.

\* $P < 0.05$ ; \*\* $P < 0.01$ .

†Participants could select more than one type of water treatment.

‡Only asked of those who had some type of toilet.

SUPPLEMENTAL TABLE 2  
Predictors for diarrhea among Mexican children under 5 years of age, 2012–2013

|                                     | Univariable ( <i>N</i> = 4,710) |             | Multivariable ( <i>N</i> = 4,707) |             |
|-------------------------------------|---------------------------------|-------------|-----------------------------------|-------------|
|                                     | RR                              | 95% CI      | aRR                               | 95% CI      |
| Child's age (months)                |                                 |             |                                   |             |
| 0–5                                 | 1.00                            | Ref         | 1.00                              | Ref         |
| 6–23                                | 1.61                            | 1.14–2.27** | 1.60                              | 1.13–2.27** |
| 24–35                               | 1.07                            | 0.71–1.61   | 1.06                              | 0.70–1.60   |
| 36–59                               | 0.68                            | 0.45–1.01   | 0.67                              | 0.44–1.00*  |
| Male child                          | 1.24                            | 1.03–1.49*  | 1.25                              | 1.04–1.49*  |
| Firstborn child                     | 1.41                            | 1.12–1.79** |                                   |             |
| Indigenous ethnicity                | 1.03                            | 0.83–1.28   |                                   |             |
| Mother's age (years)                | 0.97                            | 0.96–0.99** |                                   |             |
| Highest level of education attained |                                 |             |                                   |             |
| None                                | 1.00                            | Ref         |                                   |             |
| Primary                             | 0.85                            | 0.65–1.12   |                                   |             |
| Secondary                           | 0.98                            | 0.74–1.30   |                                   |             |
| High school or higher               | 0.89                            | 0.62–1.27   |                                   |             |
| Mother is literate                  | 1.22                            | 0.97–1.53   |                                   |             |
| Mother is a housewife               | 1.17                            | 0.75–1.85   |                                   |             |
| Urban resident                      | 1.15                            | 0.93–1.42   |                                   |             |
| Household asset index               |                                 |             |                                   |             |
| Low                                 | 1.00                            | Ref         |                                   |             |
| Medium                              | 1.00                            | 0.81–1.24   |                                   |             |
| High                                | 0.90                            | 0.67–1.20   |                                   |             |
| Source of water                     |                                 |             |                                   |             |
| Tap                                 | 1.00                            | Ref         |                                   |             |
| Borewell                            | 0.71                            | 0.37–1.35   |                                   |             |
| Other well or spring                | 1.06                            | 0.79–1.42   |                                   |             |
| Other                               | 0.71                            | 0.47–1.08   |                                   |             |
| Water treatment                     |                                 |             |                                   |             |
| Drinking water is treated           | 1.12                            | 0.81–1.55   |                                   |             |
| Boil water†                         | 1.00                            | 0.77–1.29   |                                   |             |
| Chlorinate water†                   | 0.84                            | 0.53–1.34   |                                   |             |
| Filter water†                       | 0.27                            | 0.04–2.11   |                                   |             |
| Other water treatment†              | 1.44                            | 1.10–1.88** | 1.38                              | 1.05–1.80*  |
| Toilet type                         |                                 |             |                                   |             |
| Flush/pour flush toilet             | 1.18                            | 0.94–1.49   | 1.14                              | 0.91–1.44   |
| Latrine/toilet with hole            | 1.00                            | Ref         | 1.00                              | Ref         |
| Dry toilet                          | 2.33                            | 1.30–4.16** | 2.71                              | 1.57–4.70** |
| No toilet                           | 1.33                            | 0.65–2.73   | 1.34                              | 0.67–2.67   |
| Toilet is shared with other homes‡  | 1.44                            | 1.07–1.94*  |                                   |             |

aRR = adjusted relative risk; CI = confidence interval; Ref = reference; RR = relative risk.

\**P* < 0.05; \*\**P* < 0.01.

†Participants could select more than one type of water treatment.

‡Only asked of those who had some type of toilet.

SUPPLEMENTAL TABLE 3  
Predictors for diarrhea among Panamanian children under 5 years of age, 2013

|                                     | Univariable (N = 913) |             | Multivariable (N = 895) |             |
|-------------------------------------|-----------------------|-------------|-------------------------|-------------|
|                                     | RR                    | 95% CI      | aRR                     | 95% CI      |
| Child's age (months)                |                       |             |                         |             |
| 0-5                                 | 1.00                  | Ref         |                         |             |
| 6-23                                | 2.58                  | 0.95-7.01   |                         |             |
| 24-35                               | 2.20                  | 0.88-5.50   |                         |             |
| 36-59                               | 1.44                  | 0.54-3.85   |                         |             |
| Male child                          | 1.16                  | 0.89-1.51   |                         |             |
| Firstborn child                     | 0.52                  | 0.23-1.17   |                         |             |
| Mother's age (years)                | 1.01                  | 0.99-1.04   |                         |             |
| Highest level of education attained |                       |             |                         |             |
| None                                | 1.00                  | Ref         |                         |             |
| Primary                             | 1.01                  | 0.56-1.80   |                         |             |
| Secondary                           | 0.89                  | 0.50-1.58   |                         |             |
| High school or higher               | 0.82                  | 0.23-2.89   |                         |             |
| Mother is literate                  | 0.95                  | 0.63-1.43   |                         |             |
| Mother is a housewife               | 1.53                  | 0.44-5.33   |                         |             |
| Household asset index               |                       |             |                         |             |
| Low                                 | 1.00                  | Ref         |                         |             |
| Medium                              | 1.02                  | 0.61-1.72   |                         |             |
| High                                | 1.06                  | 0.61-1.87   |                         |             |
| Source of water                     |                       |             |                         |             |
| Tap                                 | 1.00                  | Ref         | 1.00                    | Ref         |
| Borewell                            | 3.54                  | 0.87-14.40  | 2.97                    | 0.54-16.39  |
| Other well or spring                | 1.60                  | 0.47-5.43   | 1.56                    | 0.45-5.38   |
| Other                               | 2.27                  | 1.39-3.70** | 1.80                    | 1.10-2.93*  |
| Water treatment                     |                       |             |                         |             |
| Drinking water is treated           | 1.14                  | 0.69-1.90   |                         |             |
| Boil water†                         | 0.81                  | 0.42-1.55   |                         |             |
| Chlorinate water†                   | 1.33                  | 0.73-2.41   |                         |             |
| Filter water†                       | 3.50                  | 2.18-5.60** | 2.52                    | 1.61-3.93** |
| Other water treatment†              | 1.59                  | 0.68-3.75   |                         |             |
| Toilet type                         |                       |             |                         |             |
| Flush/pour flush toilet             | 0.54                  | 0.07-4.25   |                         |             |
| Latrine/toilet with hole            | 1.00                  | Ref         | 1.00                    | Ref         |
| Dry toilet                          | 3.04                  | 0.50-18.59  | 2.15                    | 0.84-5.49   |
| No toilet                           | 1.55                  | 0.94-2.55   | 1.48                    | 0.87-2.51   |
| Other                               | 0.61                  | 0.33-1.14   | 0.74                    | 0.40-1.36   |
| Toilet is shared with other homes‡  | 0.79                  | 0.28-2.21   |                         |             |

aRR = adjusted relative risk; CI = confidence interval; Ref = reference; RR = relative risk.  
\* $P < 0.05$ ; \*\* $P < 0.01$ .

†Participants could select more than one type of water treatment.

‡Only asked of those who had some type of toilet.



SUPPLEMENTAL TABLE 4  
Predictors for diarrhea among Nicaraguan children under 5 years of age, 2013

|                                     | Univariable ( <i>N</i> = 1,312) |             | Multivariable ( <i>N</i> = 1,312) |             |
|-------------------------------------|---------------------------------|-------------|-----------------------------------|-------------|
|                                     | RR                              | 95% CI      | aRR                               | 95% CI      |
| Child's age (months)                |                                 |             |                                   |             |
| 0–5                                 | 1.00                            | Ref         | 1.00                              | Ref         |
| 6–23                                | 1.16                            | 0.69–1.96   | 1.16                              | 0.70–1.94   |
| 24–35                               | 0.89                            | 0.53–1.50   | 0.95                              | 0.58–1.56   |
| 36–59                               | 0.48                            | 0.28–0.83** | 0.56                              | 0.33–0.94*  |
| Male child                          | 1.06                            | 0.82–1.37   |                                   |             |
| Firstborn child                     | 1.57                            | 1.15–2.13** | 0.98                              | 0.70–1.38   |
| Indigenous ethnicity                | 0.79                            | 0.39–1.60   |                                   |             |
| Mother's age (years)                | 0.94                            | 0.92–0.96** | 0.95                              | 0.93–0.98** |
| Highest level of education attained |                                 |             |                                   |             |
| None                                | 1.00                            | Ref         |                                   |             |
| Primary                             | 1.04                            | 0.61–1.78   |                                   |             |
| Secondary                           | 1.09                            | 0.63–1.90   |                                   |             |
| High school or higher               | 1.21                            | 0.71–2.06   |                                   |             |
| Mother is literate                  | 1.14                            | 0.86–1.51   |                                   |             |
| Mother is a housewife               | 1.08                            | 0.71–1.63   |                                   |             |
| Urban resident                      | 1.00                            | 0.68–1.46   |                                   |             |
| Household asset index               |                                 |             |                                   |             |
| Low                                 | 1.00                            | Ref         |                                   |             |
| Medium                              | 1.18                            | 0.85–1.64   |                                   |             |
| High                                | 1.42                            | 0.95–2.12   |                                   |             |
| Source of water                     |                                 |             |                                   |             |
| Tap                                 | 1.00                            | Ref         |                                   |             |
| Borewell                            | 1.10                            | 0.34–3.58   |                                   |             |
| Other well or spring                | 1.02                            | 0.71–1.46   |                                   |             |
| Other                               | 0.89                            | 0.45–1.77   |                                   |             |
| Water treatment                     |                                 |             |                                   |             |
| Drinking water is treated           |                                 |             |                                   |             |
| Boil water†                         | 1.17                            | 0.75–1.83   |                                   |             |
| Chlorinate water†                   | 1.16                            | 0.66–2.02   |                                   |             |
| Filter water†                       | 1.21                            | 0.73–2.00   |                                   |             |
| Other water treatment†              | 1.48                            | 0.27–8.10   |                                   |             |
| Other water treatment†              | 0.88                            | 0.26–3.02   |                                   |             |
| Toilet type                         |                                 |             |                                   |             |
| Flush/pour flush toilet             | 0.72                            | 0.38–1.39   |                                   |             |
| Latrine/toilet with hole            | 1.00                            | Ref         |                                   |             |
| No toilet                           | 0.89                            | 0.61–1.28   |                                   |             |
| Toilet is shared with other homes‡  | 0.78                            | 0.47–1.30   |                                   |             |

aRR = adjusted relative risk; CI = confidence interval; Ref = reference; RR = relative risk.

\**P* < 0.05; \*\**P* < 0.01.

†Participants could select more than one type of water treatment.

‡Only asked of those who had some type of toilet.

SUPPLEMENTAL TABLE 5  
Predictors for diarrhea among Salvadoran children under 5 years of age, 2011

|                                     | Univariable (N = 3,465) |             | Multivariable (N = 3,406) |            |
|-------------------------------------|-------------------------|-------------|---------------------------|------------|
|                                     | RR                      | 95% CI      | aRR                       | 95% CI     |
| Child's age (months)                |                         |             |                           |            |
| 0-5                                 | 1.00                    | Ref         | 1.00                      | Ref        |
| 6-23                                | 1.64                    | 1.12-2.40*  | 1.64                      | 1.12-2.40* |
| 24-35                               | 1.05                    | 0.68-1.61   | 1.05                      | 0.68-1.61  |
| 36-59                               | 0.81                    | 0.55-1.19   | 0.81                      | 0.55-1.19  |
| Male child                          | 0.87                    | 0.74-1.04   |                           |            |
| Firstborn child                     | 1.26                    | 1.04-1.53*  |                           |            |
| Mother's age (years)                | 0.98                    | 0.97-1.00** |                           |            |
| Highest level of education attained |                         |             |                           |            |
| None                                | 1.00                    | Ref         |                           |            |
| Primary                             | 1.13                    | 0.77-1.68   |                           |            |
| Secondary                           | 1.35                    | 0.89-2.02   |                           |            |
| High school or higher               | 1.12                    | 0.65-1.94   |                           |            |
| Mother is literate                  | 0.97                    | 0.76-1.24   |                           |            |
| Mother is a housewife               | 0.92                    | 0.69-1.22   |                           |            |
| Urban resident                      | 0.80                    | 0.63-1.01   |                           |            |
| Household asset index               |                         |             |                           |            |
| Low                                 | 1.00                    | Ref         |                           |            |
| Medium                              | 1.00                    | 0.80-1.24   |                           |            |
| High                                | 1.04                    | 0.79-1.35   |                           |            |
| Source of water                     |                         |             |                           |            |
| Tap                                 | 1.00                    | Ref         |                           |            |
| Borewell                            | 0.54                    | 0.32-0.89*  |                           |            |
| Other well or spring                | 1.08                    | 0.84-1.39   |                           |            |
| Other                               | 0.92                    | 0.56-1.52   |                           |            |
| Water treatment                     |                         |             |                           |            |
| Drinking water is treated           | 0.96                    | 0.78-1.19   |                           |            |
| Boil water†                         | 0.78                    | 0.52-1.15   |                           |            |
| Chlorinate water†                   | 1.10                    | 0.86-1.42   |                           |            |
| Filter water†                       | 1.16                    | 0.51-2.63   |                           |            |
| Other water treatment†              | 0.75                    | 0.41-1.35   |                           |            |
| Toilet type                         |                         |             |                           |            |
| Flush/pour flush toilet             | 0.86                    | 0.67-1.09   |                           |            |
| Latrine/toilet with hole            | 1.00                    | Ref         |                           |            |
| Dry toilet                          | 1.09                    | 0.81-1.46   |                           |            |
| No toilet                           | 1.20                    | 0.88-1.64   |                           |            |
| Toilet is shared with other homes‡  | 1.04                    | 0.80-1.36   |                           |            |

aRR = adjusted relative risk; CI = confidence interval; Ref = reference; RR = relative risk.

\* $P < 0.05$ ; \*\* $P < 0.01$ .

†Participants could select more than one type of water treatment.

‡Only asked of those who had some type of toilet.

SUPPLEMENTAL TABLE 6  
Predictors for diarrhea among children under 2 years of age in Mesoamerica, 2011–2013

|                                     | Univariable ( <i>N</i> = 6,019) |             | Multivariable ( <i>N</i> = 5,833) |             |
|-------------------------------------|---------------------------------|-------------|-----------------------------------|-------------|
|                                     | RR                              | 95% CI      | aRR                               | 95% CI      |
| Child's age (months)                |                                 |             |                                   |             |
| 0–5                                 | 1.00                            | Ref         | 1.00                              | Ref         |
| 6–11                                | 1.37                            | 1.01–1.86*  | 1.36                              | 1.01–1.84*  |
| 12–23                               | 1.54                            | 1.16–2.03** | 1.57                              | 1.20–2.05** |
| Currently breast-feeding            | 0.89                            | 0.73–1.08   |                                   |             |
| Male child                          | 1.17                            | 1.01–1.36*  | 1.18                              | 1.02–1.36*  |
| Firstborn child                     | 1.35                            | 1.10–1.65** | 1.21                              | 0.97–1.52   |
| Mother's age (years)                | 0.98                            | 0.96–0.99** | 0.98                              | 0.97–1.00*  |
| Highest level of education attained |                                 |             |                                   |             |
| None                                | 1.00                            | Ref         |                                   |             |
| Primary                             | 1.05                            | 0.83–1.32   |                                   |             |
| Secondary                           | 1.22                            | 0.94–1.58   |                                   |             |
| High school or higher               | 1.01                            | 0.75–1.36   |                                   |             |
| Mother is literate                  | 1.16                            | 0.97–1.38   |                                   |             |
| Mother is a housewife               | 1.32                            | 0.92–1.90   |                                   |             |
| Urban resident                      | 0.92                            | 0.74–1.15   |                                   |             |
| Household asset index               |                                 |             |                                   |             |
| Low                                 | 1.00                            | Ref         |                                   |             |
| Medium                              | 1.14                            | 0.95–1.38   |                                   |             |
| High                                | 1.11                            | 0.86–1.43   |                                   |             |
| Source of water                     |                                 |             |                                   |             |
| Tap                                 | 1.00                            | Ref         |                                   |             |
| Borewell                            | 1.24                            | 0.61–2.52   |                                   |             |
| Other well or spring                | 1.19                            | 0.96–1.47   |                                   |             |
| Other                               | 0.72                            | 0.50–1.04   |                                   |             |
| Water treatment                     |                                 |             |                                   |             |
| Drinking water is treated           | 0.97                            | 0.78–1.20   |                                   |             |
| Boil water†                         | 0.94                            | 0.77–1.16   |                                   |             |
| Chlorinate water†                   | 1.29                            | 0.89–1.85   |                                   |             |
| Filter water†                       | 0.95                            | 0.28–3.14   |                                   |             |
| Other water treatment†              | 0.70                            | 0.49–0.99*  |                                   |             |
| Toilet type                         |                                 |             |                                   |             |
| Flush/pour flush toilet             | 0.85                            | 0.69–1.04   | 0.83                              | 0.67–1.01   |
| Latrine/toilet with hole            | 1.00                            | Ref         | 1.00                              | Ref         |
| Dry toilet                          | 1.19                            | 0.72–1.98   | 1.22                              | 0.74–2.00   |
| No toilet                           | 0.95                            | 0.65–1.40   | 0.95                              | 0.66–1.36   |
| Toilet is shared with other homes‡  | 0.35                            | 0.20–0.60** | 0.37                              | 0.22–0.63** |
| Country                             |                                 |             |                                   |             |
| Guatemala                           | 1.00                            | Ref         |                                   |             |
| Mexico                              | 0.91                            | 0.76–1.10   |                                   |             |
| Nicaragua                           | 1.18                            | 0.89–1.56   |                                   |             |
| Panama                              | 0.69                            | 0.46–1.02   |                                   |             |
| El Salvador                         | 1.09                            | 0.89–1.32   |                                   |             |

aRR = adjusted relative risk; CI = confidence interval; Ref = reference; RR = relative risk.

\**P* < 0.05; \*\**P* < 0.01.

†Participants could select more than one type of water treatment.

‡Only asked of those who had some type of toilet.

SUPPLEMENTAL TABLE 7  
Predictors for diarrhea among children under 6 months of age in Mesoamerica, 2011–2013

|                                     | Univariable (N = 1,387) |           | Multivariable (N = 1,347) |            |
|-------------------------------------|-------------------------|-----------|---------------------------|------------|
|                                     | RR                      | 95% CI    | aRR                       | 95% CI     |
| Exclusive breast-feeding            | 0.73                    | 0.47–1.14 |                           |            |
| Male child                          | 1.38                    | 0.92–2.06 |                           |            |
| Firstborn child                     | 1.57                    | 0.99–2.48 | 1.59                      | 1.01–2.49* |
| Mother's age (years)                | 0.98                    | 0.95–1.02 |                           |            |
| Highest level of education attained |                         |           |                           |            |
| None                                | 1.00                    | Ref       |                           |            |
| Primary                             | 0.63                    | 0.36–1.10 |                           |            |
| Secondary                           | 0.92                    | 0.52–1.61 |                           |            |
| High school or higher               | 0.55                    | 0.27–1.09 |                           |            |
| Mother is literate                  | 1.35                    | 0.88–2.07 |                           |            |
| Mother is a housewife               | 2.81                    | 1.03–7.64 | 2.88                      | 1.05–7.85* |
| Urban resident                      | 0.98                    | 0.56–1.70 |                           |            |
| Household asset index               |                         |           |                           |            |
| Low                                 | 1.00                    | Ref       |                           |            |
| Medium                              | 1.22                    | 0.80–1.87 |                           |            |
| High                                | 1.16                    | 0.63–2.13 |                           |            |
| Source of water                     |                         |           |                           |            |
| Tap                                 | 1.00                    | Ref       |                           |            |
| Borewell                            | 0.81                    | 0.20–3.33 |                           |            |
| Other well or spring                | 1.09                    | 0.57–2.09 |                           |            |
| Other                               | 0.68                    | 0.28–1.66 |                           |            |
| Water treatment                     |                         |           |                           |            |
| Drinking water is treated           | 0.80                    | 0.46–1.36 |                           |            |
| Boil water†                         | 0.89                    | 0.53–1.49 |                           |            |
| Chlorinate water†                   | 1.33                    | 0.64–2.76 |                           |            |
| Filter water†                       | –                       |           |                           |            |
| Other water treatment†              | 0.29                    | 0.09–0.94 | 0.30                      | 0.09–0.97* |
| Toilet type                         |                         |           |                           |            |
| Flush/pour flush toilet             | 0.95                    | 0.58–1.56 |                           |            |
| Latrine/toilet with hole            | 1.00                    | Ref       |                           |            |
| Dry toilet                          | 1.29                    | 0.51–3.29 |                           |            |
| No toilet                           | 0.94                    | 0.46–1.93 |                           |            |
| Toilet is shared with other homes‡  | 1.24                    | 0.71–2.14 |                           |            |
| Country                             |                         |           |                           |            |
| Guatemala                           | 1.00                    | Ref       |                           |            |
| Mexico                              | 1.03                    | 0.69–1.56 |                           |            |
| Nicaragua                           | 1.74                    | 0.95–3.20 |                           |            |
| Panama                              | 0.53                    | 0.21–1.30 |                           |            |
| El Salvador                         | 1.20                    | 0.77–1.87 |                           |            |

aRR = adjusted relative risk; CI = confidence interval; Ref = reference; RR = relative risk.

\* $P < 0.05$ .

†Participants could select more than one type of water treatment.

‡Only asked of those who had some type of toilet.

SUPPLEMENTAL TABLE 8  
Correlates of positive feeding practices among children with diarrhea in Mesoamerica, 2011–2013

|                                     | Univariable (N = 1,935) |             | Multivariable (N = 1,862) |             |
|-------------------------------------|-------------------------|-------------|---------------------------|-------------|
|                                     | RR                      | 95% CI      | aRR                       | 95% CI      |
| Child's age (months)                |                         |             |                           |             |
| 0–5                                 | 1.00                    | –           |                           |             |
| 6–23                                | 0.81                    | 0.56–1.17   |                           |             |
| 24–35                               | 0.57                    | 0.36–0.89*  |                           |             |
| 36–59                               | 0.60                    | 0.37–0.96*  |                           |             |
| Male child                          | 0.92                    | 0.72–1.17   |                           |             |
| Firstborn child                     | 1.22                    | 0.93–1.58   |                           |             |
| Mother's age                        | 0.98                    | 0.96–1.00*  |                           |             |
| Highest level of education attained |                         |             |                           |             |
| None                                | 1.00                    | –           |                           |             |
| Primary                             | 0.91                    | 0.60–1.39   |                           |             |
| Secondary                           | 1.09                    | 0.69–1.72   |                           |             |
| High school or higher               | 0.86                    | 0.52–1.43   |                           |             |
| Mother is literate                  | 1.16                    | 0.86–1.55   |                           |             |
| Mother is a housewife               | 1.02                    | 0.63–1.64   |                           |             |
| Asset index                         |                         |             |                           |             |
| Low                                 | 1.00                    | –           |                           |             |
| Medium                              | 1.14                    | 0.87–1.50   |                           |             |
| High                                | 1.11                    | 0.75–1.63   |                           |             |
| Source of water                     |                         |             |                           |             |
| Tap                                 | 1.00                    | –           | 1.00                      |             |
| Borewell                            | 2.74                    | 1.70–4.40** | 3.06                      | 1.75–5.36** |
| Other well or spring                | 1.16                    | 0.82–1.63   | 1.14                      | 0.81–1.63   |
| Other                               | 1.02                    | 0.67–1.55   | 0.91                      | 0.57–1.44   |
| Drinking water is treated           | 0.75                    | 0.59–0.96*  | 0.69                      | 0.48–0.99*  |
| Given ORS                           | 0.98                    | 0.74–1.28   |                           |             |
| Country                             |                         |             |                           |             |
| Guatemala                           | 1.00                    | –           | 1.00                      |             |
| Mexico                              | 1.38                    | 1.04–1.83*  | 1.32                      | 1.00–1.75   |
| Nicaragua                           | 1.50                    | 1.15–1.96** | 1.11                      | 0.73–1.67   |
| Panama                              | 2.44                    | 1.81–3.29** | 2.18                      | 1.38–3.44** |
| El Salvador                         | 1.51                    | 1.14–2.00** | 1.18                      | 0.78–1.79   |

aRR = adjusted relative risk; CI = confidence interval; ORS = oral rehydration solution; RR = relative risk.

\* $P < 0.05$ ; \*\* $P < 0.01$ .

SUPPLEMENTAL TABLE 9  
Correlates of positive feeding practices among children with diarrhea in Guatemala, 2013

|                                     | Univariable (N = 603) |             | Multivariable (N = 603) |             |
|-------------------------------------|-----------------------|-------------|-------------------------|-------------|
|                                     | RR                    | 95% CI      | aRR                     | 95% CI      |
| Child's age (months)                |                       |             |                         |             |
| 0-5                                 | 1.00                  | –           | 1.00                    |             |
| 6-23                                | 0.56                  | 0.35-0.90*  | 0.56                    | 0.35-0.90*  |
| 24-35                               | 0.47                  | 0.28-0.80** | 0.47                    | 0.28-0.80** |
| 36-59                               | 0.42                  | 0.24-0.71** | 0.42                    | 0.24-0.71** |
| Male child                          | 0.74                  | 0.52-1.05   |                         |             |
| Firstborn child                     | 1.28                  | 0.89-1.84   |                         |             |
| Indigenous                          | 0.68                  | 0.44-1.03   |                         |             |
| Mother's age                        | 0.97                  | 0.94-1.00*  |                         |             |
| Highest level of education attained |                       |             |                         |             |
| None                                | 1.00                  | –           |                         |             |
| Primary                             | 1.11                  | 0.75-1.64   |                         |             |
| Secondary                           | 0.77                  | 0.29-2.01   |                         |             |
| High school or higher               | 1.45                  | 0.71-2.96   |                         |             |
| Mother is literate                  | 1.14                  | 0.80-1.64   |                         |             |
| Mother is a housewife               | 0.90                  | 0.41-1.99   |                         |             |
| Urban resident                      | 1.26                  | 0.75-2.13   |                         |             |
| Asset index                         |                       |             |                         |             |
| Low                                 | 1.00                  | –           |                         |             |
| Medium                              | 0.99                  | 0.67-1.48   |                         |             |
| High                                | 1.01                  | 0.56-1.82   |                         |             |
| Source of water                     |                       |             |                         |             |
| Tap                                 | 1.00                  | –           |                         |             |
| Borewell                            | 0.78                  | 0.12-5.18   |                         |             |
| Other well or spring                | 0.66                  | 0.38-1.16   |                         |             |
| Other                               | 1.21                  | 0.49-3.01   |                         |             |
| Drinking water is treated           | 1.19                  | 0.47-3.03   |                         |             |
| Given ORS                           | 0.66                  | 0.42-1.06   |                         |             |

aRR = adjusted relative risk; CI = confidence interval; ORS = oral rehydration solution; RR = relative risk.  
\*P < 0.05; \*\*P < 0.01.

SUPPLEMENTAL TABLE 10  
Correlates of positive feeding practices among children with diarrhea in Chiapas, Mexico, 2012-2013

|                                     | Univariable (N = 545) |             | Multivariable (N = 545) |             |
|-------------------------------------|-----------------------|-------------|-------------------------|-------------|
|                                     | RR                    | 95% CI      | aRR                     | 95% CI      |
| Child's age (months)                |                       |             |                         |             |
| 0-5                                 | 1.00                  | –           |                         |             |
| 6-23                                | 0.81                  | 0.48-1.38   |                         |             |
| 24-35                               | 0.61                  | 0.35-1.08   |                         |             |
| 36-59                               | 0.74                  | 0.38-1.45   |                         |             |
| Male child                          | 0.97                  | 0.72-1.32   |                         |             |
| Firstborn child                     | 1.18                  | 0.81-1.71   |                         |             |
| Indigenous                          | 0.85                  | 0.58-1.27   |                         |             |
| Mother's age                        | 0.99                  | 0.96-1.02   |                         |             |
| Highest level of education attained |                       |             |                         |             |
| None                                | 1.00                  | –           |                         |             |
| Primary                             | 1.01                  | 0.53-1.93   |                         |             |
| Secondary                           | 1.06                  | 0.55-2.06   |                         |             |
| High school or higher               | 0.86                  | 0.40-1.85   |                         |             |
| Mother is literate                  | 1.08                  | 0.72-1.64   |                         |             |
| Mother is a housewife               | 1.45                  | 0.76-2.75   |                         |             |
| Urban resident                      | 1.05                  | 0.70-1.57   |                         |             |
| Asset index                         |                       |             |                         |             |
| Low                                 | 1.00                  | –           |                         |             |
| Medium                              | 1.13                  | 0.75-1.72   |                         |             |
| High                                | 1.18                  | 0.68-2.07   |                         |             |
| Source of water                     |                       |             |                         |             |
| Tap                                 | 1.00                  | –           | 1.00                    |             |
| Borewell                            | 3.53                  | 2.51-4.95** | 4.01                    | 2.91-5.53** |
| Other well or spring                | 0.93                  | 0.50-1.71   | 1.00                    | 0.56-1.80   |
| Other                               | 1.09                  | 0.61-1.96   | 0.97                    | 0.52-1.80   |
| Drinking water is treated           | 0.59                  | 0.39-0.92*  | 0.57                    | 0.37-0.88*  |
| Given ORS                           | 0.71                  | 0.46-1.11   |                         |             |

aRR = adjusted relative risk; CI = confidence interval; ORS = oral rehydration solution; RR = relative risk.  
\*P < 0.05; \*\*P < 0.01.

SUPPLEMENTAL TABLE 11  
Correlates of positive feeding practices among children with diarrhea in Nicaragua, 2013

|                                     | Univariable (N = 191) |            | Multivariable (N = 191) |            |
|-------------------------------------|-----------------------|------------|-------------------------|------------|
|                                     | RR                    | 95% CI     | aRR                     | 95% CI     |
| Child's age (months)                |                       |            |                         |            |
| 0-5                                 | 1.00                  | –          |                         |            |
| 6-23                                | 0.89                  | 0.41-1.92  |                         |            |
| 24-35                               | 0.54                  | 0.20-1.47  |                         |            |
| 36-59                               | 0.41                  | 0.17-1.00  |                         |            |
| Male child                          | 0.89                  | 0.52-1.53  |                         |            |
| Firstborn child                     | 1.26                  | 0.73-2.18  |                         |            |
| Indigenous                          | 1.57                  | 0.79-3.15  |                         |            |
| Mother's age                        | 0.96                  | 0.91-1.01  |                         |            |
| Highest level of education attained |                       |            |                         |            |
| None                                | 1.00                  | –          |                         |            |
| Primary                             | 0.67                  | 0.32-1.41  |                         |            |
| Secondary                           | 1.03                  | 0.43-2.45  |                         |            |
| High school or higher               | 0.64                  | 0.24-1.70  |                         |            |
| Mother is literate                  | 1.26                  | 0.65-2.47  |                         |            |
| Mother is a housewife               | 0.81                  | 0.39-1.67  |                         |            |
| Urban resident                      | 1.01                  | 0.65-1.55  |                         |            |
| Asset index                         |                       |            |                         |            |
| Low                                 | 1.00                  | –          |                         |            |
| Medium                              | 1.21                  | 0.73-2.00  |                         |            |
| High                                | 0.96                  | 0.46-1.99  |                         |            |
| Source of water                     |                       |            |                         |            |
| Tap                                 | 1.00                  | –          | 1.00                    |            |
| Borewell                            | 2.81                  | 1.22-6.45* | 2.39                    | 1.17-4.88* |
| Other well or spring                | 1.45                  | 0.82-2.57  | 1.63                    | 0.92-2.87  |
| Other                               | 0.43                  | 0.09-1.99  | 0.47                    | 0.10-2.12  |
| Drinking water is treated           | 1.06                  | 0.59-1.91  |                         |            |
| Given ORS                           | 1.69                  | 1.01-2.83* | 1.74                    | 1.04-2.90* |

aRR = adjusted relative risk; CI = confidence interval; ORS = oral rehydration solution; RR = relative risk.  
\*P < 0.05; \*\*P < 0.01.

SUPPLEMENTAL TABLE 12  
Correlates of positive feeding practices among children with diarrhea in Panama, 2013

|                                     | Univariable (N = 99) |             | Multivariable (N = 98) |            |
|-------------------------------------|----------------------|-------------|------------------------|------------|
|                                     | RR                   | 95% CI      | aRR                    | 95% CI     |
| Child's age (months)                |                      |             |                        |            |
| 0-5                                 | 1.00                 | –           |                        |            |
| 6-23                                | 0.88                 | 0.28-2.76   |                        |            |
| 24-35                               | 1.07                 | 0.31-3.67   |                        |            |
| 36-59                               | 0.92                 | 0.32-2.66   |                        |            |
| Male child                          | 0.82                 | 0.59-1.14   |                        |            |
| Firstborn child                     | 0.57                 | 0.17-1.87   |                        |            |
| Mother's age                        | 0.98                 | 0.94-1.02   |                        |            |
| Highest level of education attained |                      |             |                        |            |
| None                                | 1.00                 | –           |                        |            |
| Primary                             | 0.81                 | 0.42-1.58   |                        |            |
| Secondary                           | 1.11                 | 0.49-2.51   |                        |            |
| High school or higher               | 1.56                 | 0.67-3.63   |                        |            |
| Mother is literate                  | 1.40                 | 0.77-2.57   |                        |            |
| Mother is a housewife               | 1.80                 | 0.28-11.59  |                        |            |
| Asset index                         |                      |             |                        |            |
| Low                                 | 1.00                 | –           | 1.00                   |            |
| Medium                              | 0.78                 | 0.46-1.30   | 0.80                   | 0.50-1.29  |
| High                                | 1.54                 | 1.01-2.34*  | 1.58                   | 1.02-2.46* |
| Source of water                     |                      |             |                        |            |
| Tap                                 | 1.00                 | –           |                        |            |
| Borewell                            | 0.00                 | 0.00-0.00** |                        |            |
| Other well or spring                | 0.00                 | 0.00-0.00** |                        |            |
| Other                               | 1.30                 | 0.87-1.93   |                        |            |
| Drinking water is treated           | 0.66                 | 0.41-1.06   | 0.62                   | 0.42-0.93  |
| Given ORS                           | 0.51                 | 0.26-1.00*  | 0.51                   | 0.27-0.97  |

aRR = adjusted relative risk; CI = confidence interval; ORS = oral rehydration solution; RR = relative risk.  
\*P < 0.05; \*\*P < 0.01.

SUPPLEMENTAL TABLE 13  
Correlates of positive feeding practices among children with diarrhea in El Salvador, 2011

|                                     | Univariable (N = 497) |             | Multivariable (N = 432) |             |
|-------------------------------------|-----------------------|-------------|-------------------------|-------------|
|                                     | RR                    | 95% CI      | aRR                     | 95% CI      |
| Child's age (months)                |                       |             |                         |             |
| 0-5                                 | 1.00                  | –           | 1.00                    |             |
| 6-23                                | 0.80                  | 0.48–1.31   | 0.82                    | 0.51–1.31   |
| 24-35                               | 0.44                  | 0.25–0.79** | 0.46                    | 0.26–0.82** |
| 36-59                               | 0.59                  | 0.34–1.03   | 0.60                    | 0.35–1.02   |
| Male child                          | 0.94                  | 0.71–1.25   |                         |             |
| Firstborn child                     | 1.16                  | 0.84–1.61   |                         |             |
| Mother's age                        | 0.99                  | 0.97–1.01   |                         |             |
| Highest level of education attained |                       |             |                         |             |
| None                                | 1.00                  | –           |                         |             |
| Primary                             | 0.62                  | 0.39–1.00*  |                         |             |
| Secondary                           | 0.58                  | 0.34–0.98*  |                         |             |
| High school or higher               | 1.03                  | 0.56–1.87   |                         |             |
| Mother is literate                  | 0.90                  | 0.63–1.28   |                         |             |
| Mother is a housewife               | 1.28                  | 0.75–2.19   |                         |             |
| Urban resident                      | 1.67                  | 1.16–2.42** | 1.71                    | 1.19–2.45** |
| Asset index                         |                       |             |                         |             |
| Low                                 | 1.00                  | –           |                         |             |
| Medium                              | 1.09                  | 0.75–1.58   |                         |             |
| High                                | 1.23                  | 0.76–1.97   |                         |             |
| Source of water                     |                       |             |                         |             |
| Tap                                 | 1.00                  | –           |                         |             |
| Borewell                            | 0.00                  | 0.00–0.00** |                         |             |
| Other well or spring                | 1.17                  | 0.75–1.82   |                         |             |
| Other                               | 1.23                  | 0.56–2.72   |                         |             |
| Drinking water is treated           | 0.80                  | 0.57–1.13   |                         |             |
| Given ORS                           | 0.74                  | 0.56–0.97*  |                         |             |

aRR = adjusted relative risk; CI = confidence interval; ORS = oral rehydration solution; RR = relative risk.  
\*P < 0.05; \*\*P < 0.01.
